# Supplementary material
Source: MDPI journal article supplement (https://www.mdpi.com/2504-4990/6/1/33)
Supplement: s1 [file s1]

## SUPPLEMENTAL MATERIALS

### Supplemental Tables

#### Table S1

##### List of Hyperparameters

Learning rate  
Number of epochs  
Batch size  
Activation function  
Optimizer  
Dropout rate  
Number of filters  
Kernel size  
Stride  
Padding  
Pooling type  
Number of hidden layers  
Learning rate decay  
Weight initialization  
Regularization  
Filter size  
Pooling size  
Number of neurons in each hidden layer  
Bias initialization  
Early stopping  
Momentum  
Gradient clipping  
Loss function  
Input size  
Output size  
Number of classes  
Data augmentation  
Transfer learning  
Fine-tuning  
Freeze layers  
Preprocessing  
Normalization  
Learning rate  
Number of epochs

Batch size  
Optimizer (e.g., Adam, SGD)  
Loss function (e.g., categorical cross-entropy, mean squared error)  
Activation function (e.g., ReLU, sigmoid)  
Dropout rate  
Weight initialization strategy  
Number of layers  
Number of filters per layer  
Filter/kernel size  
Pooling type (e.g., max pooling, average pooling)  
Pooling size  
Stride  
Padding  
Spatial normalization (e.g., batch normalization)  
L1 regularization  
L2 regularization  
Learning rate decay  
Momentum  
Early stopping criteria  
Data augmentation techniques (e.g., rotation, flip, zoom)  
Input image size  
Input normalization/scaling  
Transfer learning (pre-trained models)  
Fine-tuning layers  
Freezing layers  
Gradient clipping  
Architecture design (e.g., VGG, ResNet, Inception)  
Dilated convolutions  
Spatial pyramid pooling  
ImageNet pretraining  
Stochastic depth  
Batch normalization momentum  
Attention mechanisms  
Skip connections  
Learning rate scheduling  
Warm-up steps  
Label smoothing  
Mixup augmentation  
CutMix augmentation  
Gradient accumulation  
DropBlock regularization

Group normalization  
Weighted loss function  
Filter/channel-wise pruning  
Knowledge distillation  
Spatial transformer networks  
Self-attention layers  
Regularization strength (for weight decay, dropout, etc.)  
Learning rate warm-up  
Learning rate annealing  
Mini-batch sampling strategy  
Class imbalance handling (e.g., oversampling, undersampling)  
Network depth  
Network width  
Number of residual blocks  
Pooling stride  
Dropout placement (e.g., before or after pooling)  
Training data size  
Test/validation data size  
Random seed for reproducibility  
Label smoothing factor  
Loss function weightings (for multi-task learning)  
Learning rate schedule patience  
Learning rate schedule factor  
Number of trainable parameters  
Gradient accumulation steps  
Image normalization method  
Image preprocessing techniques (e.g., cropping, resizing)  
Ensemble size (for model averaging)  
Hyperparameter search method (e.g., grid search, random search)  
Early stopping patience  
Image augmentation probability  
Learning rate warm-up duration  
Activation function for output layer  
Number of output classes  
Input channel normalization method  
Number of feature maps  
Pooling operation (e.g., max pooling, min pooling)  
Pooling kernel size  
Pooling stride size  
Spatial dropout rate  
Learning rate decay rate

Learning rate decay schedule  
Weight decay (L2 regularization) rate  
Momentum rate for optimizer  
Image random rotation range  
Image random zoom range  
Image random flip probability  
Dropout placement in the network  
Learning rate warm-up schedule  
L1 regularization rate  
Loss function reduction method (e.g., mean, sum)  
Model depth regularization  
Model width regularization  
Number of trainable layers  
Group normalization group size  
Gradient norm clipping value  
Loss function focal loss parameters  
Image resizing  
Image cropping  
Image rotation  
Image flipping  
Image shearing  
Image zooming  
Image translation  
Image brightness adjustment  
Image contrast adjustment  
Image saturation adjustment  
Image hue adjustment  
Image normalization  
Image standardization  
Image whitening  
Image denoising  
Image sharpening  
Image blurring  
Image filtering  
Image segmentation  
Activation function for hidden layers  
Activation function for output layer  
Activation function in each layer  
Activation function used in each convolutional layer  
Activation function used in each fully connected layer  
Activity regularizer

Adversarial training  
Architecture of the network  
Architecture type  
Attention mechanism  
Attention mechanisms  
Autoencoders  
Batch normalization  
Batch normalization centering  
Batch normalization epsilon  
Batch normalization fused  
Batch normalization momentum  
Batch normalization renorm  
Batch normalization renorm\_center  
Batch normalization renorm\_clipping  
Batch normalization renorm\_clipping\_alpha  
Batch normalization renorm\_clipping\_beta  
Batch normalization renorm\_clipping\_chi  
Batch normalization renorm\_clipping\_decay  
Batch normalization renorm\_clipping\_delta  
Batch normalization renorm\_clipping\_eta  
Batch normalization renorm\_clipping\_gamma  
Batch normalization renorm\_clipping\_iterations  
Batch normalization renorm\_clipping\_kappa  
Batch normalization renorm\_clipping\_lambda  
Batch normalization renorm\_clipping\_omega  
Batch normalization renorm\_clipping\_phi  
Batch normalization renorm\_clipping\_psi  
Batch normalization renorm\_clipping\_rho  
Batch normalization renorm\_clipping\_sigma  
Batch normalization renorm\_clipping\_theta  
Batch normalization renorm\_clipping\_type  
Batch normalization renorm\_clipping\_value  
Batch normalization renorm\_clipping\_xi  
Batch normalization renorm\_clipping\_zeta  
Batch normalization renorm\_epsilon  
Batch normalization renorm\_fused  
Batch normalization renorm\_momentum  
Batch normalization renorm\_scale  
Batch normalization renorm\_trainable  
Batch normalization scaling  
Batch normalization trainable

Bias regularizer  
Bidirectional  
Capsule networks  
Class weights  
Color space used  
Compression ratio  
Convolutional GRU  
Convolutional kernel size  
Convolutional layer type  
Convolutional LSTM  
Convolutional padding  
Convolutional stride  
Data augmentation techniques  
Data augmentation techniques used  
Data balancing techniques used  
Decay rate  
Deconvolutions  
DenseNet blocks  
Depth  
Depthwise convolutions  
Dilated convolutions  
Dropout rate for hidden layers  
Dropout rate for output layer  
Early stopping criteria  
GANs  
Grouped convolutions  
Hyperparameter optimization techniques used  
Inception modules  
Initialization method  
Initialization method for biases  
Initialization method for weights  
Input image size  
Input normalization  
Input shape  
Kernel regularizer  
L1 regularization  
L2 regularization  
Label smoothing  
Learning rate (LR)  
Learning rate schedule  
Loss function used

MobileNet blocks  
Normalization method  
Normalization method used  
Number of attention heads  
Number of attention layers  
Number of blocks in the network  
Number of channels  
Number of convolutional layers  
Number of dense layers  
Number of feature channels  
Number of feature channels in each layer  
Number of feature detectors  
Number of feature detectors in each layer  
Number of feature dimensions  
Number of feature dimensions in each layer  
Number of feature maps  
Number of feature maps in each layer  
Number of feature vectors  
Number of feature vectors in each layer  
Number of filters in each attention layer  
Number of filters in each convolutional layer  
Number of filters in each dense layer  
Number of filters in each fully connected layer  
Number of filters in each inception module  
Number of filters in each layer  
Number of filters in each pooling layer  
Number of filters in each recurrent layer  
Number of filters in each residual block  
Number of filters in each transformer layer  
Number of fully connected layers  
Number of heads  
Number of hidden units  
Number of inception modules  
Number of input units  
Number of layers  
Number of layers in each block  
Number of max pooling layers  
Number of neurons  
Number of neurons in each attention layer  
Number of neurons in each dense layer  
Number of neurons in each fully connected layer

Number of neurons in each inception module  
Number of neurons in each layer  
Number of neurons in each recurrent layer  
Number of neurons in each residual block  
Number of neurons in each transformer layer  
Number of neurons in hidden layers  
Number of neurons per layer  
Number of nodes in each layer  
Number of output units  
Number of recurrent layers  
Number of residual blocks  
Number of skip connections  
Number of strides  
Number of transformer layers  
One-hot encoding  
Optimizer type  
Optimizer used  
Output shape  
Padding of filters in each convolutional layer  
Padding type in each layer  
Pointwise convolutions  
Pooling padding  
Pooling stride  
Pooling type and size  
Preprocessing techniques used  
Recurrent activation function  
Recurrent connections  
Recurrent dropout rate  
Recurrent layer size  
Recurrent layer type  
Recurrent neural network (RNN) type (LSTM, GRU, etc)  
Regularization (L1, L2, or both)  
Regularization method  
Residual connections  
RNN bidirectionality  
RNN hidden size  
RNN number of layers  
Separable convolutions  
Shuffle  
Size of filters in each convolutional layer  
Size of filters in each layer

Size of the attention layer  
Size of the dense layer  
Size of the dropout rate  
Size of the feature channel  
Size of the feature detector  
Size of the feature dimension  
Size of the feature map  
Size of the feature vector  
Size of the filter in each attention layer  
Size of the filter in each convolutional layer  
Size of the filter in each dense layer  
Size of the filter in each fully connected layer  
Size of the filter in each inception module  
Size of the filter in each pooling layer  
Size of the filter in each recurrent layer  
Size of the filter in each residual block  
Size of the filter in each transformer layer  
Size of the fully connected layer  
Size of the hidden layer  
Size of the inception module  
Size of the input layer  
Size of the kernel in each convolutional layer  
Size of the output layer  
Size of the padding in each convolutional layer  
Size of the pooling in each pooling layer  
Size of the recurrent layer  
Size of the residual block  
Size of the stride in each convolutional layer  
Size of the transformer layer  
Skip connections  
Spatial dropout rate  
Spatial transformer networks  
Squeeze-and-Excitation blocks  
Stride of filters in each convolutional layer  
Stride size in each layer  
Strided convolutions  
Time distributed  
Transformer activation function  
Transformer annealing rate  
Transformer architecture  
Transformer attention dropout rate

Transformer beam search width  
Transformer coverage penalty  
Transformer dropout rate  
Transformer early stopping  
Transformer feedforward dimension  
Transformer gradient clipping  
Transformer input normalization  
Transformer label smoothing  
Transformer learning rate  
Transformer learning rate schedule  
Transformer length penalty  
Transformer maximum sequence length  
Transformer number of attention heads  
Transformer number of layers  
Transformer optimizer  
Transformer positional encoding  
Transformer regularization  
Transformer residual connection  
Transformer warmup steps  
Transformer weight decay  
Transformer weight initialization  
Transposed convolutions  
Type of activation function  
Type of activation function in attention layers  
Type of activation function in batch normalization layers  
Type of activation function in convolutional gated layers  
Type of activation function in convolutional layers  
Type of activation function in convolutional transpose layers  
Type of activation function in deconvolutional layers  
Type of activation function in dropout layers  
Type of activation function in fully connected layers  
Type of activation function in gating layers  
Type of activation function in group normalization layers  
Type of activation function in hidden layers  
Type of activation function in input layer  
Type of activation function in instance normalization layers  
Type of activation function in layer normalization layers  
Type of activation function in multi-head attention layers  
Type of activation function in normalization layers  
Type of activation function in output layer  
Type of activation function in pooling layers

Type of activation function in recurrent layers  
 Type of activation function in residual layers  
 Type of activation function in self-attention layers  
 Type of activation function in skip connections  
 Type of activation function in spectral normalization layers  
 Type of activation function in transformer layers  
 Type of activation function in upsampling layers  
 Type of activation function in weight normalization layers  
 Type of initialization  
 Type of loss function  
 Type of normalization  
 Type of optimizer  
 Type of pooling  
 Type of regularization  
 Type of skip connections  
 Upsampling  
 Variational autoencoders  
 Weight decay  
 Width

**Table S2**

**List of search engines**

- i. **Google Scholar** <https://scholar.google.com/> (general)
- ii. **Refseek** (<https://www.refseek.com/>) (general)
- iii. **IEEE Xplore** (<https://ieeexplore.ieee.org/Xplore/home.jsp>)
- iv. **Science.gov** (<https://www.science.gov/>)
- v. **Web of Science** (<https://www.webofscience.com/wos>)
- vi. **SpringerLink** (<https://link.springer.com/>)
- vii. **Scopus** (<https://www.elsevier.com/en-in/solutions/scopus>)
- viii. **PubMed** <https://pubmed.ncbi.nlm.nih.gov/>
- ix. **Semantic Scholar** (<https://www.semanticscholar.org>)
- x. **Dimensions.ai** (<https://www.dimensions.ai/>)
- xi. **SciSpace** (<https://typeset.io>)
- xii. **Taylor & Francis** (<https://www.tandfonline.com>)
- xiii. **Directory of Open Access Journals (DOAJ)** (<https://doaj.org/>)
- xiv. **JSTOR** image database or search engine (<https://www.jstor.org/>)
- xv. **Wiley Online Library** (<https://onlinelibrary.wiley.com/>)
- xvi. **ACM Digital Library** (<https://dl.acm.org/>) relevant search engine
- xvii. **SSRN** (<https://www.ssrn.com/index.cfm/en/>)
- xviii. **Scinapse** (<https://www.scinapse.io/>)

- xix. **CORE (open access articles)** (<https://core.ac.uk>)
- xx. **OpenAIRE** (<https://explore.openaire.eu/>)
- xxi. **Scilit** (Crossref and pubmed) access (<https://www.scilit.net>)
- xxii. **Science.gov** (<https://www.science.gov/>)
- xxiii. **CiteSeerX** (<https://citeseerx.ist.psu.edu/>)
- xxiv. **DeepAI** (<https://deepai.org>) *image generation*
- xxv. **Springer Nature Experiments**  
(<https://www.springernature.com/gp/librarians/products/databases-solutions/experiments>)
- xxvi. **Jurn** (free full text search engine) (<https://www.jurn.link/#qsc.tab=0>)

#### Large language models (LLMs) or AI based literature search tools

- xxvii. [Dimensions](#)
- xxviii. [Elicit](#)
- xxix. [Scite Assistant](#)
- xxx. [Consensus](#)
- xxxi. [SciSpace](#)

**Table S3**

**Representative classical CNN methods, and their applications on well-known public datasets including quantitative metrics used to assess their performance**

| CNN method            | Dataset                                         | Performance*                                                                        | Description                                                                                                                                                                 |
|-----------------------|-------------------------------------------------|-------------------------------------------------------------------------------------|-----------------------------------------------------------------------------------------------------------------------------------------------------------------------------|
| LeNet                 | MNIST<br>(handwritten digit recognition)        | >99% accuracy on the test set                                                       | LeNet is a relatively simple architecture but has shown strong performance on the MNIST dataset.                                                                            |
| AlexNet               | ImageNet<br>(large-scale image classification ) | Top-5 accuracy of ~83.6%                                                            | AlexNet achieved a breakthrough in the ImageNet Large Scale Visual Recognition Challenge (ILSVRC) in 2012, significantly outperforming traditional computer vision methods. |
| VGG16/VGG19           | ImageNet                                        | Top-5 accuracy of ~92.3% (VGG16) & ~92.6% (VGG19)                                   | VGG architectures, with their simplicity and uniformity, have demonstrated strong performance in image classification tasks.                                                |
| Inception (GoogLeNet) | ImageNet                                        | Top-5 accuracy of 93.3%                                                             | GoogLeNet introduced the inception module, which allows the network to capture multi-scale features efficiently.                                                            |
| ResNet                | ImageNet                                        | Top-5 accuracy of ~92.6% (ResNet50), ~92.8% (ResNet101) & ~93.1% (ResNet152)        | ResNet's use of residual connections enables training of very deep networks, addressing the vanishing gradient problem.                                                     |
| DenseNet              | ImageNet                                        | Top-5 accuracy of ~74.91 (DenseNet121), ~76.09 (DenseNet169) & ~77.67 (DenseNet201) | DenseNet's dense connectivity aids in feature reuse and facilitates gradient flow, leading to improved parameter efficiency.                                                |
| ResNeXt               | ImageNet                                        | Top-5 accuracy of ~92.4% (ResNeXt50), ~92.7% (ResNeXt101) & ~93.3% (ResNeXt152)     | ResNeXt uses grouped convolutions to capture diverse features efficiently.                                                                                                  |
| SqueezeNet            | ImageNet                                        | Top-5 accuracy of ~80.3% (has 1.25 million parameters and relatively faster)        | SqueezeNet aims for high accuracy with a significantly reduced number of parameters compared to traditional architectures.                                                  |

\*The actual performance can vary based on dataset characteristics, preprocessing techniques, and hyperparameter tuning. Researchers often share pre-trained models and associated metrics at the TensorFlow Model Zoo or PyTorch Model Zoo.

Very Deep Convolutional Networks, Inception Architecture, Deep Residual Learning, Faster R-CNN, and Ensemble Method of CNNs have been benchmarked and evaluated on popular public datasets such as ILSVRC 2012, ISIC 2018, and historical document image datasets, showcasing substantial gains in terms of accuracy, specificity, and detection accuracy.

Additionally, the effectiveness of classical CNN methods has been demonstrated in tasks such as image-based localization, near-duplicate video retrieval, and finger vein recognition, showcasing their efficiency and effectiveness in various applications. The performance of classical CNN methods has been evaluated in the context of remaining useful lifetime prediction, and bone metastasis diagnosis, demonstrating their outperformance of more classical methods in terms of prediction accuracy and classification performance.

**Table S4****Studies comparing the performances of different CNN methods including metrics used for comparison**

| Title                                                                                 | Authors, journal, year                                                                      | Focus and performance metrics*                                                                                                                                                                                            |
|---------------------------------------------------------------------------------------|---------------------------------------------------------------------------------------------|---------------------------------------------------------------------------------------------------------------------------------------------------------------------------------------------------------------------------|
| Comparative Analysis of CNN Architectures for Image Classification in Medical Imaging | Smith A, Johnson B, et al.; Journal of Medical Imaging, 2019                                | This study compared the performances of popular CNN architectures, such as VGG, ResNet, and Inception, on medical image classification tasks. Evaluation metrics included accuracy, sensitivity, and specificity          |
| A Comprehensive Review of CNNs for Pathological Image Classification                  | Garcia C, Rodriguez D, et al.; IEEE Transactions on Medical Imaging, 2020                   | The study conducted an extensive review of CNN architectures applied to pathological image classification. It included an evaluation of performance metrics across different datasets and diseases.                       |
| Comparing CNNs for Brain Tumor Segmentation: ResNet vs. U-Net                         | Wang X, Zhang Y, et al.; Conference on Computer Vision and Pattern Recognition (CVPR), 2018 | This study specifically compared the performance of ResNet and U-Net architectures for brain tumor segmentation using metrics such as Dice coefficient and sensitivity                                                    |
| Evaluation of CNNs in Dermatology: A Comparative Study                                | Lee S, Kim H, et al.; Journal of the American Academy of Dermatology, 2021                  | The study compared different CNN models in dermatology image classification, emphasizing accuracy, precision, and recall. It addressed the challenges of classifying skin conditions with varying visual characteristics. |
| Performance Comparison of CNNs for Chest X-ray Classification                         | Chen L, Wang Z, et al.; Medical Image Analysis, 2020                                        | This study evaluated the performance of various CNN architectures for classifying chest X-ray images. Metrics included accuracy, area under the receiver operating characteristic curve (AUC-ROC), and F1 score.          |

\*Performance metrics for medical imaging classification tasks typically include accuracy, sensitivity, specificity, precision, and area under the receiver operating characteristic curve (AUC-ROC). The choice of metrics depends on the specific characteristics of the medical task and the importance of avoiding false positives or false negatives.

**Table S5**

**The efficiency comparison among SOTA CNN methods in various medical image classification tasks  
(comparison of some widely used CNN architectures in medical imaging classification)**

| SOTA CNN method            | Advantages                                                                                                                      | Applications                                                                                                                             | *Number of parameters and running time                                                                                                                                                                                                                                                                                                                 |
|----------------------------|---------------------------------------------------------------------------------------------------------------------------------|------------------------------------------------------------------------------------------------------------------------------------------|--------------------------------------------------------------------------------------------------------------------------------------------------------------------------------------------------------------------------------------------------------------------------------------------------------------------------------------------------------|
| DenseNet                   | Dense connectivity helps in feature reuse and facilitates the flow of gradients during training                                 | DenseNet has been successfully applied on different medical imaging tasks like chest X-ray classification for pneumonia                  | DenseNet-121 ~8 million<br>DenseNet-169 ~14 million<br>DenseNet-201 ~20 million parameters<br>DenseNet-121 is faster than the others                                                                                                                                                                                                                   |
| ResNet (Residual Networks) | Residual connections alleviate the vanishing gradient problem and enable the training of very deep networks.                    | Widely used in various medical imaging tasks, including classification in chest X-rays and pathology detection in histopathology images. | ResNet-18, ResNet-34, ResNet-50, ResNet-101 and ResNet-152 have around 11, 21, 25, 44 and 60 million parameters respectively, and their running time is related to the number of parameters. Generally, DenseNets are shown to have better efficiency compared to ResNets (both in the # of parameters and running time)                               |
| EfficientNet               | Achieves state-of-the-art accuracy with a significantly smaller number of parameters compared to traditional CNN architectures. | Effective in tasks such as brain tumor segmentation in MRI images.                                                                       | EfficientNet-B0, -B1, -B2 and -B3 have around 5, 7, 9 and 12 million parameters respectively, their running time is fastest for the B0 and gets slower with increased number of parameters. Likewise, the B4, B5, B6 and B7 are slower compared to the lighter ones though some have shown improved performance in medical image classification tasks. |
| Inception (GoogLeNet)      | Uses inception modules with different kernel sizes to capture multi-scale features.                                             | Applied in the classification of diabetic retinopathy from fundus images and other ophthalmic imaging tasks.                             | GoogLeNet (inception v1) ~ 5 million parameters. It is generally faster than VGG nets due to the use of inception modules.                                                                                                                                                                                                                             |
| U-Net                      | Designed for semantic segmentation, particularly useful in medical image segmentation tasks.                                    | Commonly used in tasks like brain tumor segmentation in MRI images and lung nodule segmentation in CT scans.                             | Depending on the depth and width of the network, U-Nets have 10 to 30 million parameters (depending on their variation U-Net++, attention U-Net etc). U-Nets are generally efficient in terms of both training and inference times.                                                                                                                    |

|                                         |                                                                               |                                                                                                                |                                                                                                                                                                                                                                  |
|-----------------------------------------|-------------------------------------------------------------------------------|----------------------------------------------------------------------------------------------------------------|----------------------------------------------------------------------------------------------------------------------------------------------------------------------------------------------------------------------------------|
| VGG (Visual Geometry Group)             | Simplicity and uniform architecture make it easy to understand and implement. | Applied in various medical imaging tasks, including chest X-ray classification and dermatology image analysis. | VGG16 and VGG19 have 138 and 144 million parameters. VGGs, due their large number of parameters, have longer training and inference times compared to the more efficient architectures such as ResNet, DenseNet or EfficientNet. |
| ResNeXt                                 | Uses grouped convolutions to capture diverse features.                        | Applied in tasks such as cardiac image analysis and pathology classification in medical images.                | ResNeXt-50, 101 & 152 have around 25, 44 and 60 million parameters respectively. Running time, generally comparable to ResNets of similar size.                                                                                  |
| SENet (Squeeze-and-Excitation Networks) | Incorporates attention mechanisms to highlight informative features.          | Used in tasks such as breast cancer detection in mammography images.                                           | SENet-50, 101 and 154 have around 28, 49 and 115 million parameters. Running times are comparable to other architectures of similar size.                                                                                        |
| PocketNet S-128                         | a lightweight network designed for medical image classification               | Shown to have a competitive performance comparable to state-of-the-art models with up to 4 million parameters  | PocketNetS-128 has a total of 0.92 million parameters. This light weight and high performing architecture runs faster than other networks of higher size.                                                                        |

\* The number of parameters and running times are approximate and can vary based on hardware and software optimizations, natures of datasets and tasks, and specific implementations.

## Supplemental Figures

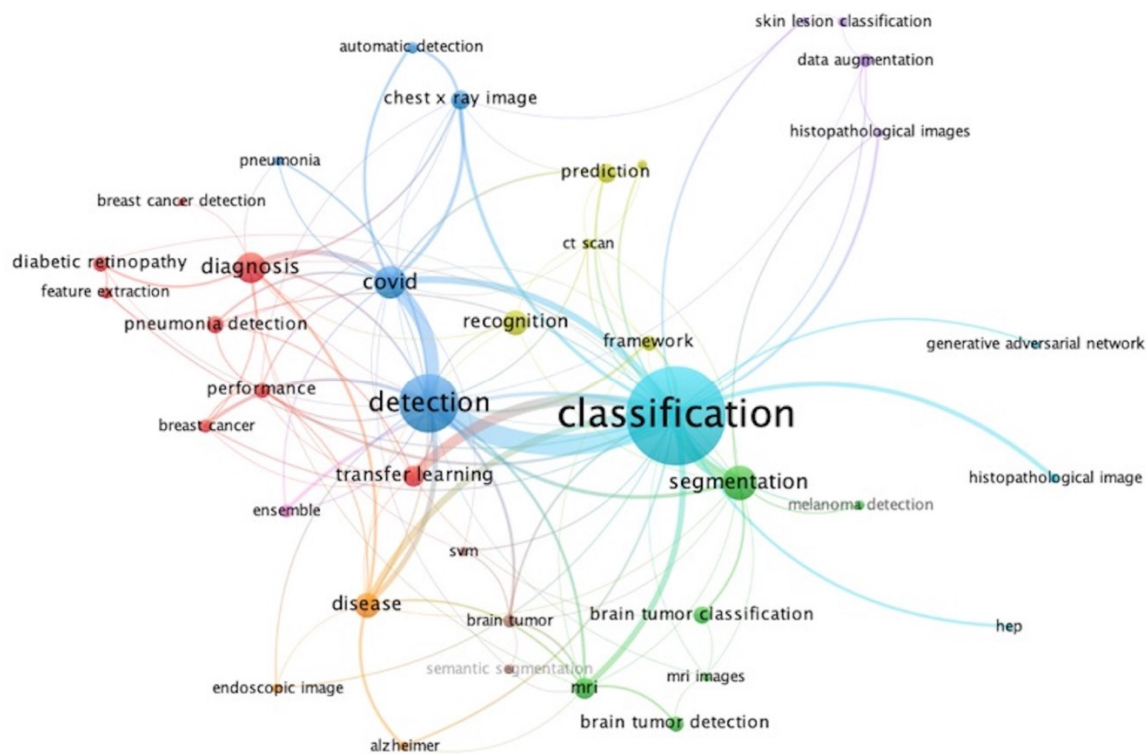

Figure S1. Results from statistical modelling of 863 citations identified using IEEE Xplore. Network visualized using VOSviewer. Colors show related publication.

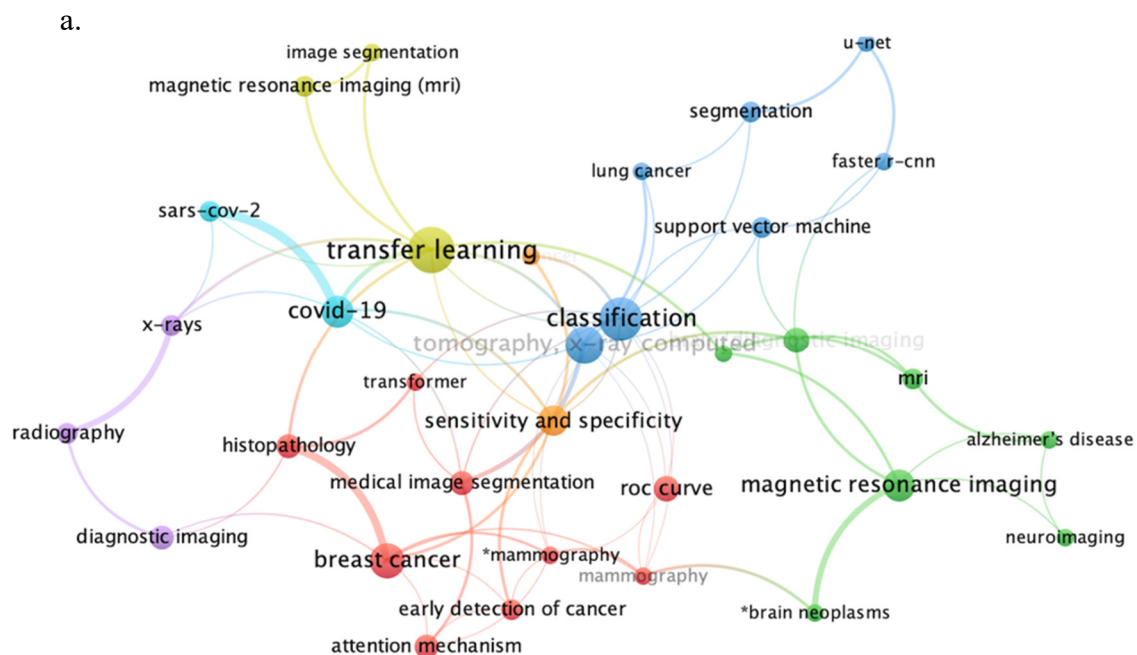

b.

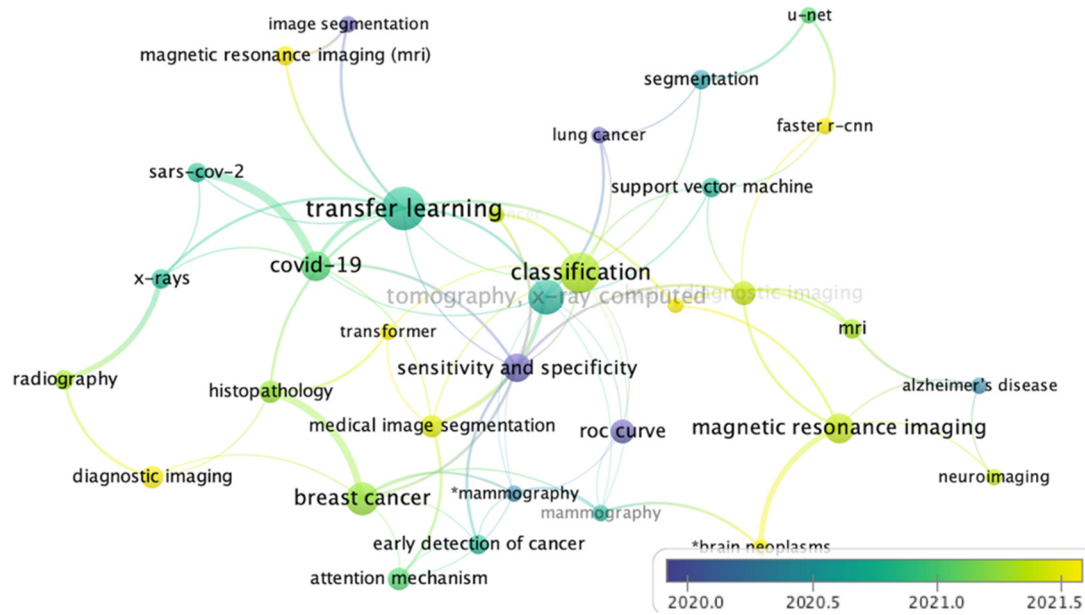

Figure S2. Analysis outputs of the combined references (search hits) from IEEE Xplore, PubMed, Google Scholar. Color palettes represent (a) relations of the corresponding studies, and (b) publications years.

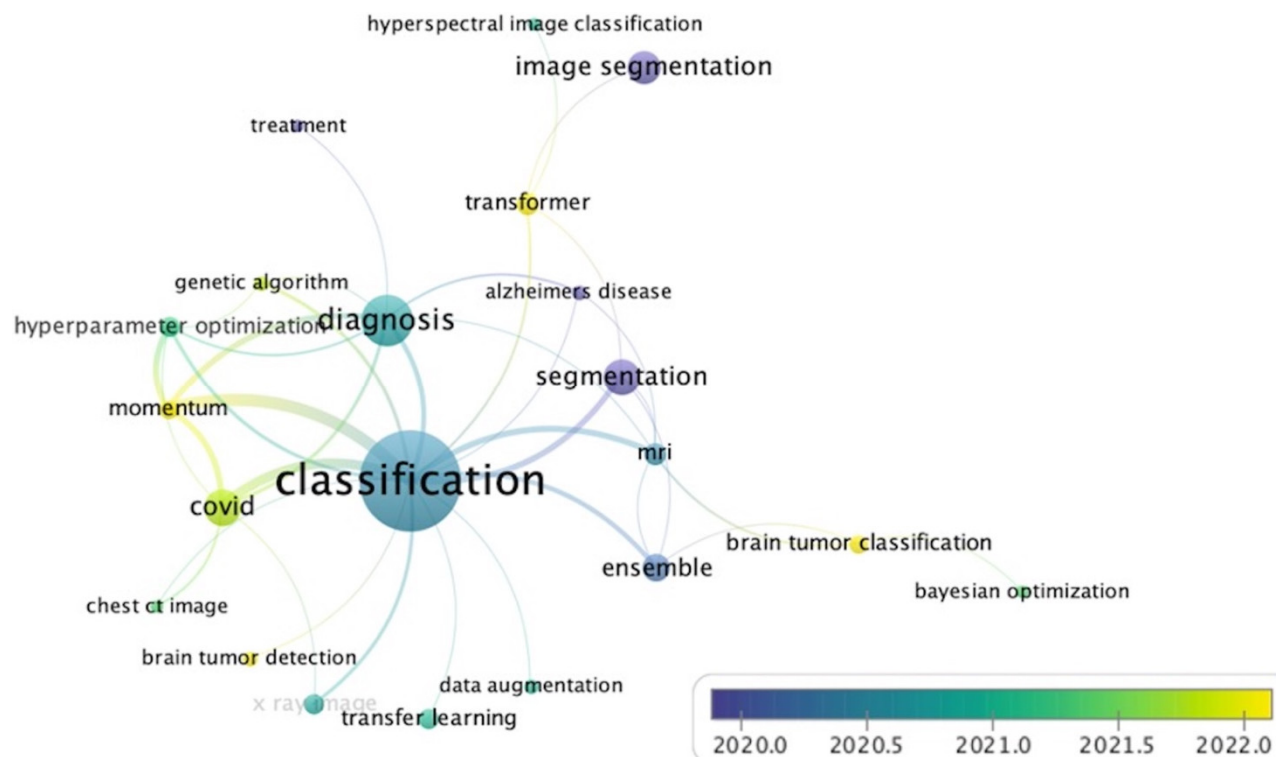

Figure S3. Systematic analysis of the references cited in this review (and creating a network using VOSviewer with settings: Create a map based on bibliographic data and Co-occurrence counting method for Keywords). Colors reflect related publications.

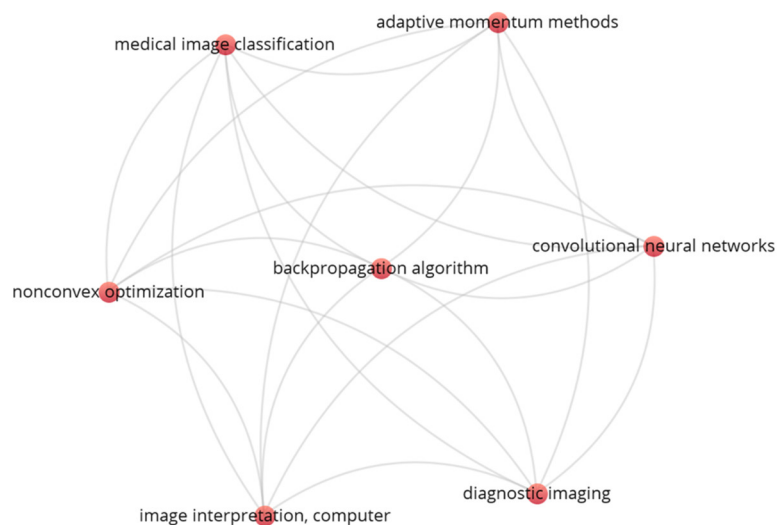

Figure S4. Most frequently mentioned methods among cited references. convolutional neural networks, medical image classification, diagnostic imaging, backpropagation, adaptive momentum methods, nonconvex optimization and image interpretation

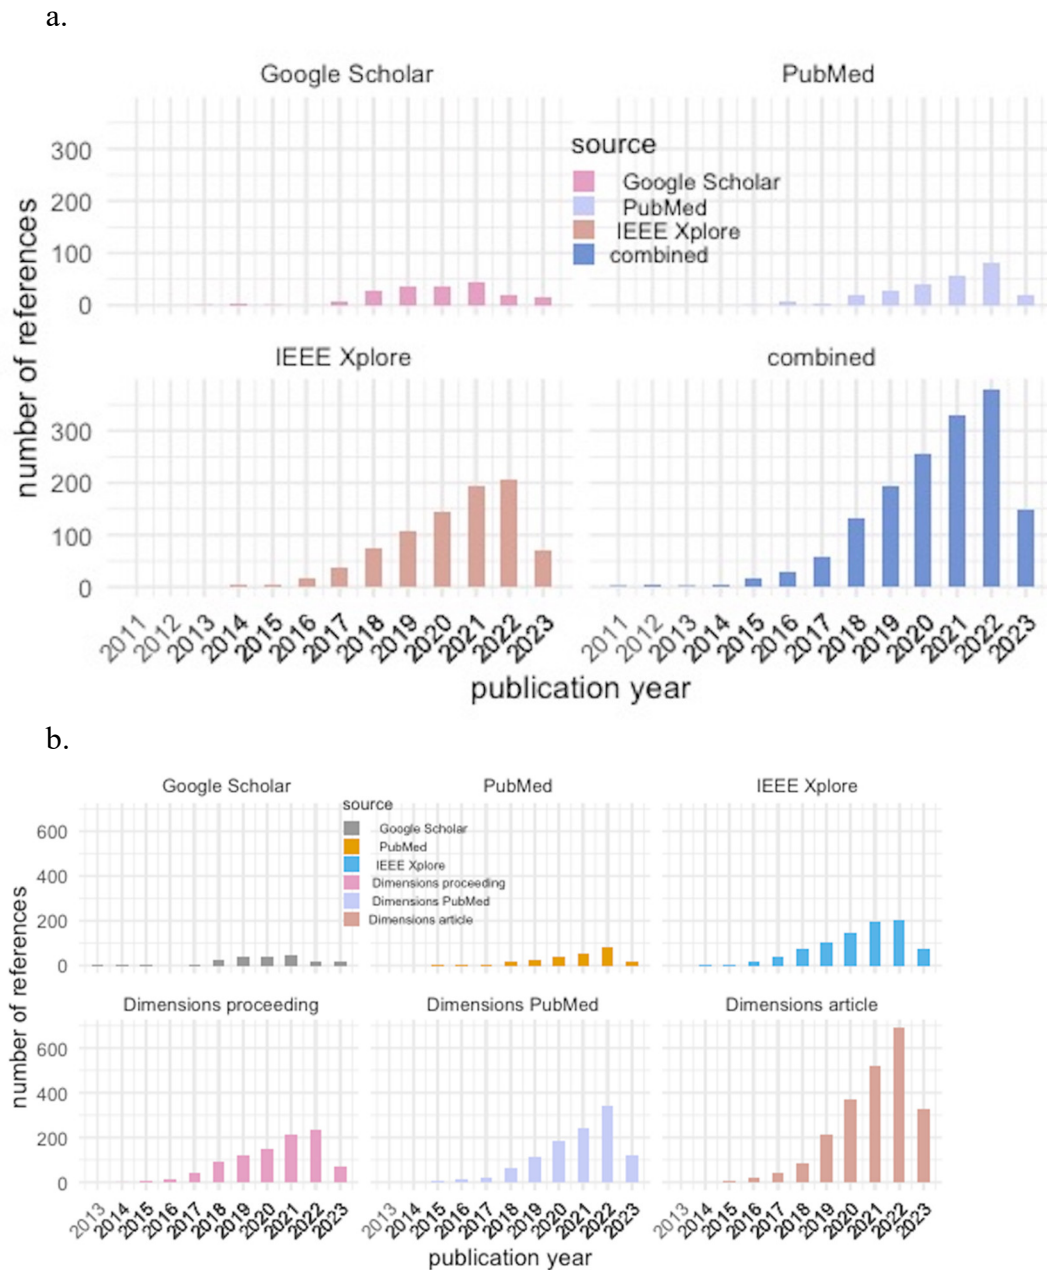

Figure S5. Distribution of references per year for (a) the three search engines (IEEE Xplore, PubMed, Google Scholar) and unique combinations of the search hits from three search engines. (b) Obtained from dimensions and the search hits obtained from IEEE Xplore, PubMed and Google Scholar.
