# Supplementary material
Source: MDPI journal article supplement (https://www.mdpi.com/2504-4990/6/1/33)
Supplement: s1 [file s1]

Archive with 1 entries (1 files):
- make-2815176-supplementary.pdf
